# Supplementary material
Source: PubMed Central journal article supplement (PMC2032012)

## Figure legends for Supplemental Data

### Figure S1. *six3b* RNA, but not *six3b<sup>vu87</sup>* RNA, Rescues the Eye Deficiency in *six3b/six7*-Deficient Embryos

Embryos from a cross between *six3b<sup>vu87/vu87</sup>* parents. (A) Uninjected controls. (B) Embryos injected with MO<sup>*six7*</sup> (*six3b/six7*-deficient embryos). (C) *six3b/six7*-deficient embryos injected with 500 pg synthetic *six3b<sup>vu87</sup>* RNA. (D) *six3b/six7*-deficient embryos injected with 5 pg *six3b* RNA. This amount of *six3b* RNA often causes dorsalization. Embryos in top of each panel are representative individuals from the groups below. Scale bar for embryos in top part of each panel is 200  $\mu\text{m}$ .

### Figure S2. Brain-Specific Randomized Laterality in *six3b/six7*-Deficient Embryos

(A-D) Graphs representing left-right organ localization (A, B, D) or left-right differences (C) in control and *six3b/six7*-deficient embryos. Control embryos are *six3b<sup>vu87/+</sup>* or *six3b<sup>vu87/vu87</sup>*, and present wild-type phenotypes. For exact embryo numbers see text. Differences between control and *six3b/six7*-deficient embryos in (A-C) are highly significant (Chi Square test;  $p < 0.001$ ). In (A) and (B), only embryos in which parpineal localization could be seen clearly were scored.

**Figure S3. Precocious Nodal Pathway Activity in *six3b/six7*-Deficient Embryos**

At 18-20s stage, only 5% of embryos in a clutch comprising approximately 1:1 ratio of *six3b*<sup>vu87/+</sup> and *six3b*<sup>vu87/vu87</sup> embryos express *lft1* in the diencephalon. When injected with MO<sup>six7</sup>, the fraction of *six3b*<sup>vu87/vu87</sup>, but not *six3b*<sup>vu87/+</sup> embryos, that express *lft1* increases significantly (Chi Square test; p<0.001). Exact embryo numbers and percentages are depicted.

**Figure S4. Prechordal Plate Appears Normal in *six3b/six7*-Deficient Embryos**

(A, C, E, G) Control, uninjected embryos (*six3b*<sup>vu87/+</sup> or *six3b*<sup>vu87/vu87</sup>), stained with prechordal plate markers at the end of gastrulation (9.5-10 hpf). (B, D, F, H) Representative sibling embryos injected with MO<sup>six7</sup>.

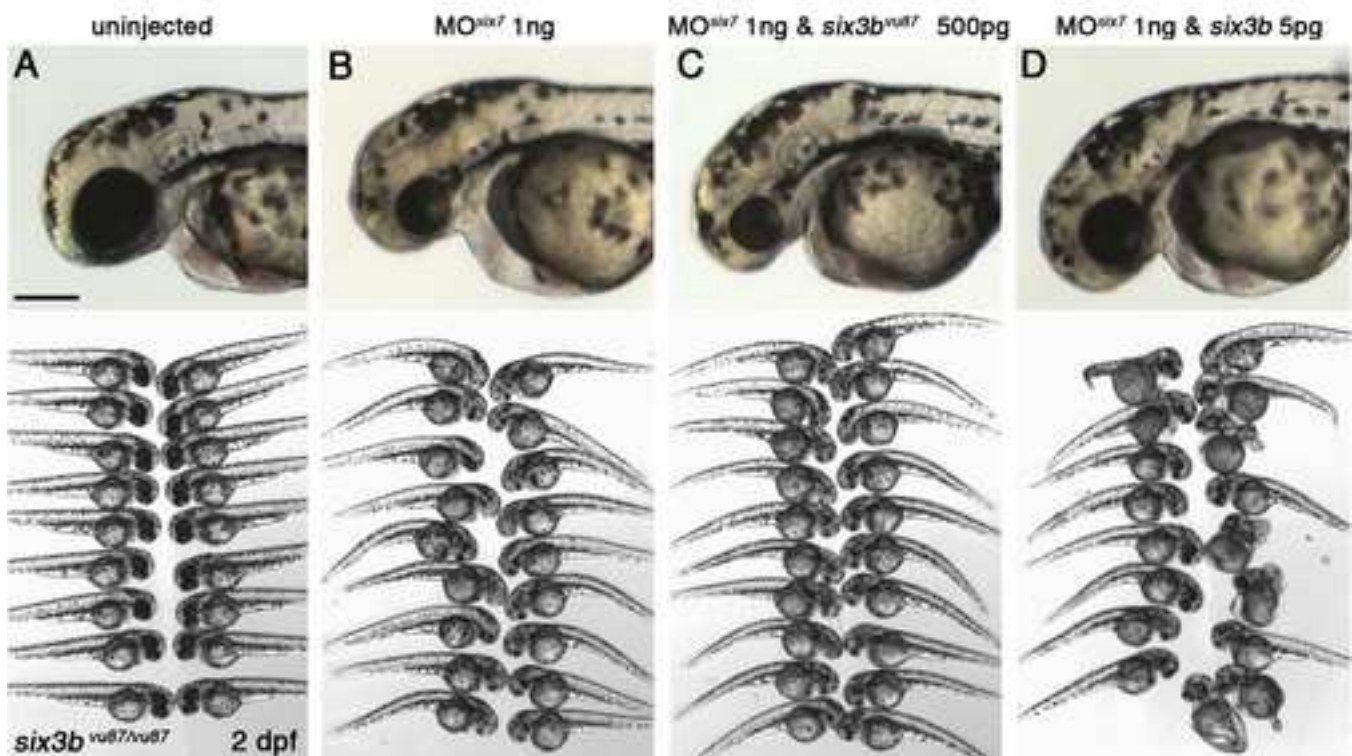

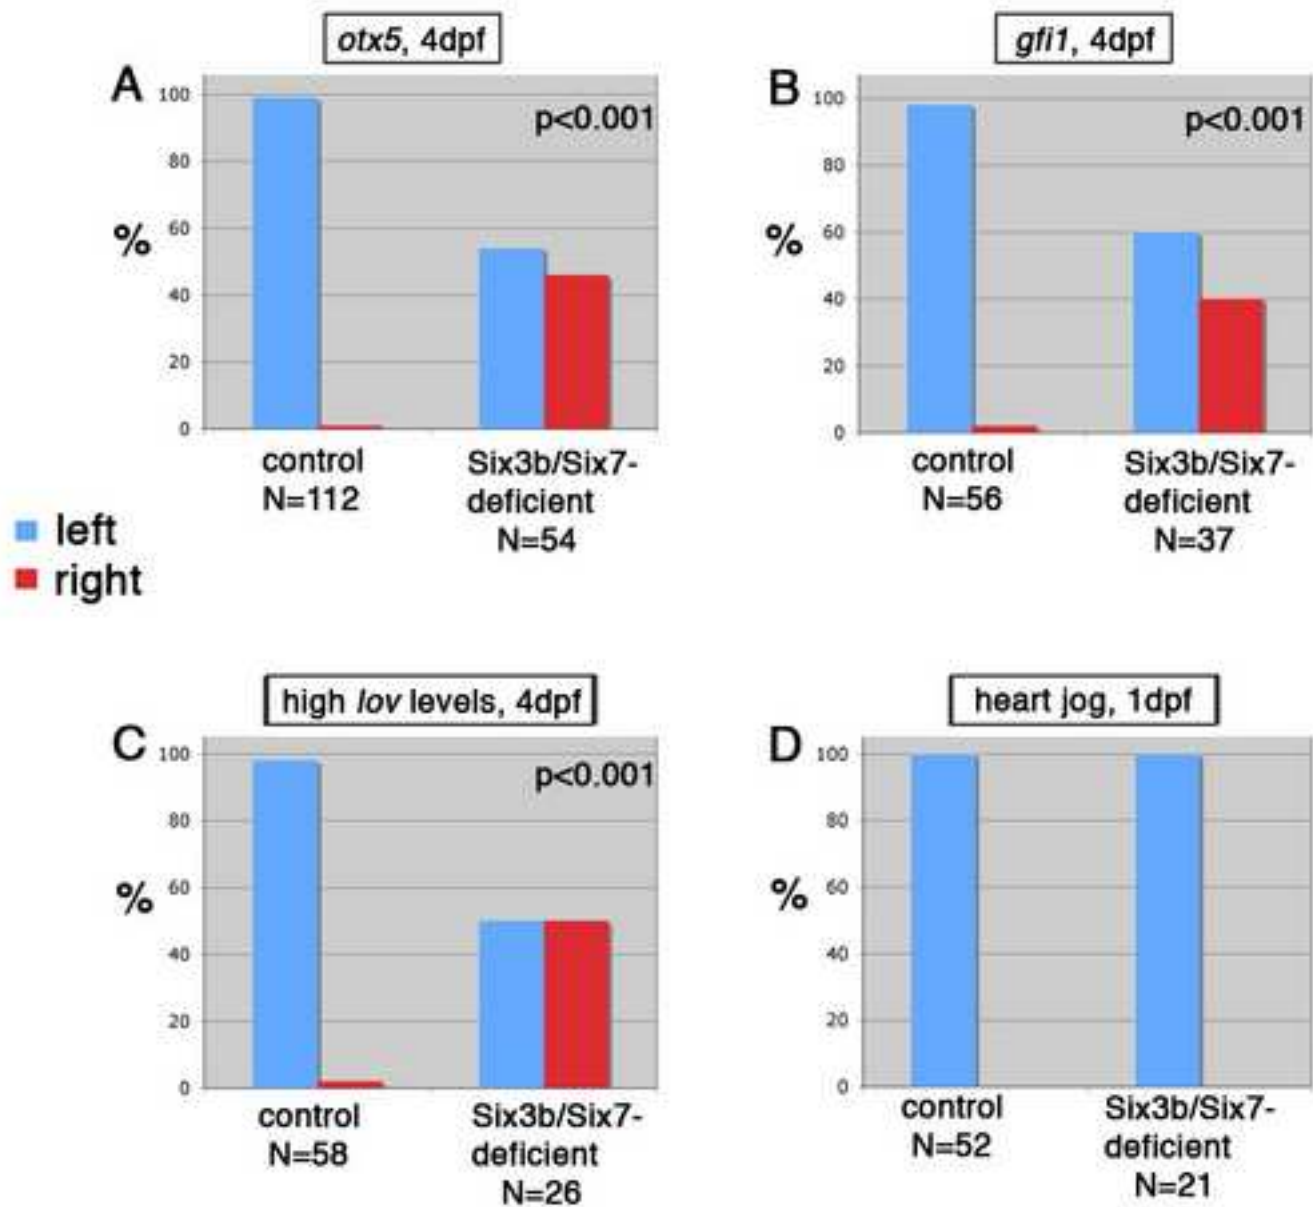

- no *lft1* expression, *six3b*<sup>vu87/+</sup> or *six3b*<sup>vu87/vu87</sup>
- *lft1* expression, *six3b*<sup>vu87/+</sup>
- *lft1* expression, *six3b*<sup>vu87/vu87</sup>

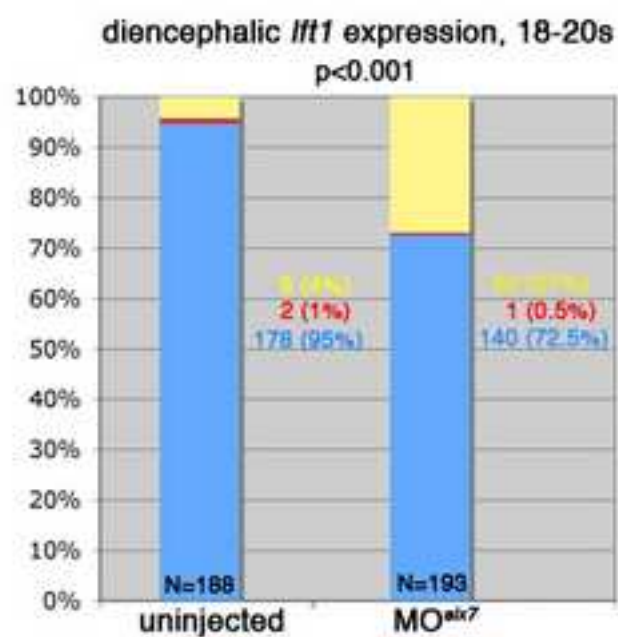

*six3b*<sup>vu87/+</sup> , *six3b*<sup>vu87/vu87</sup>

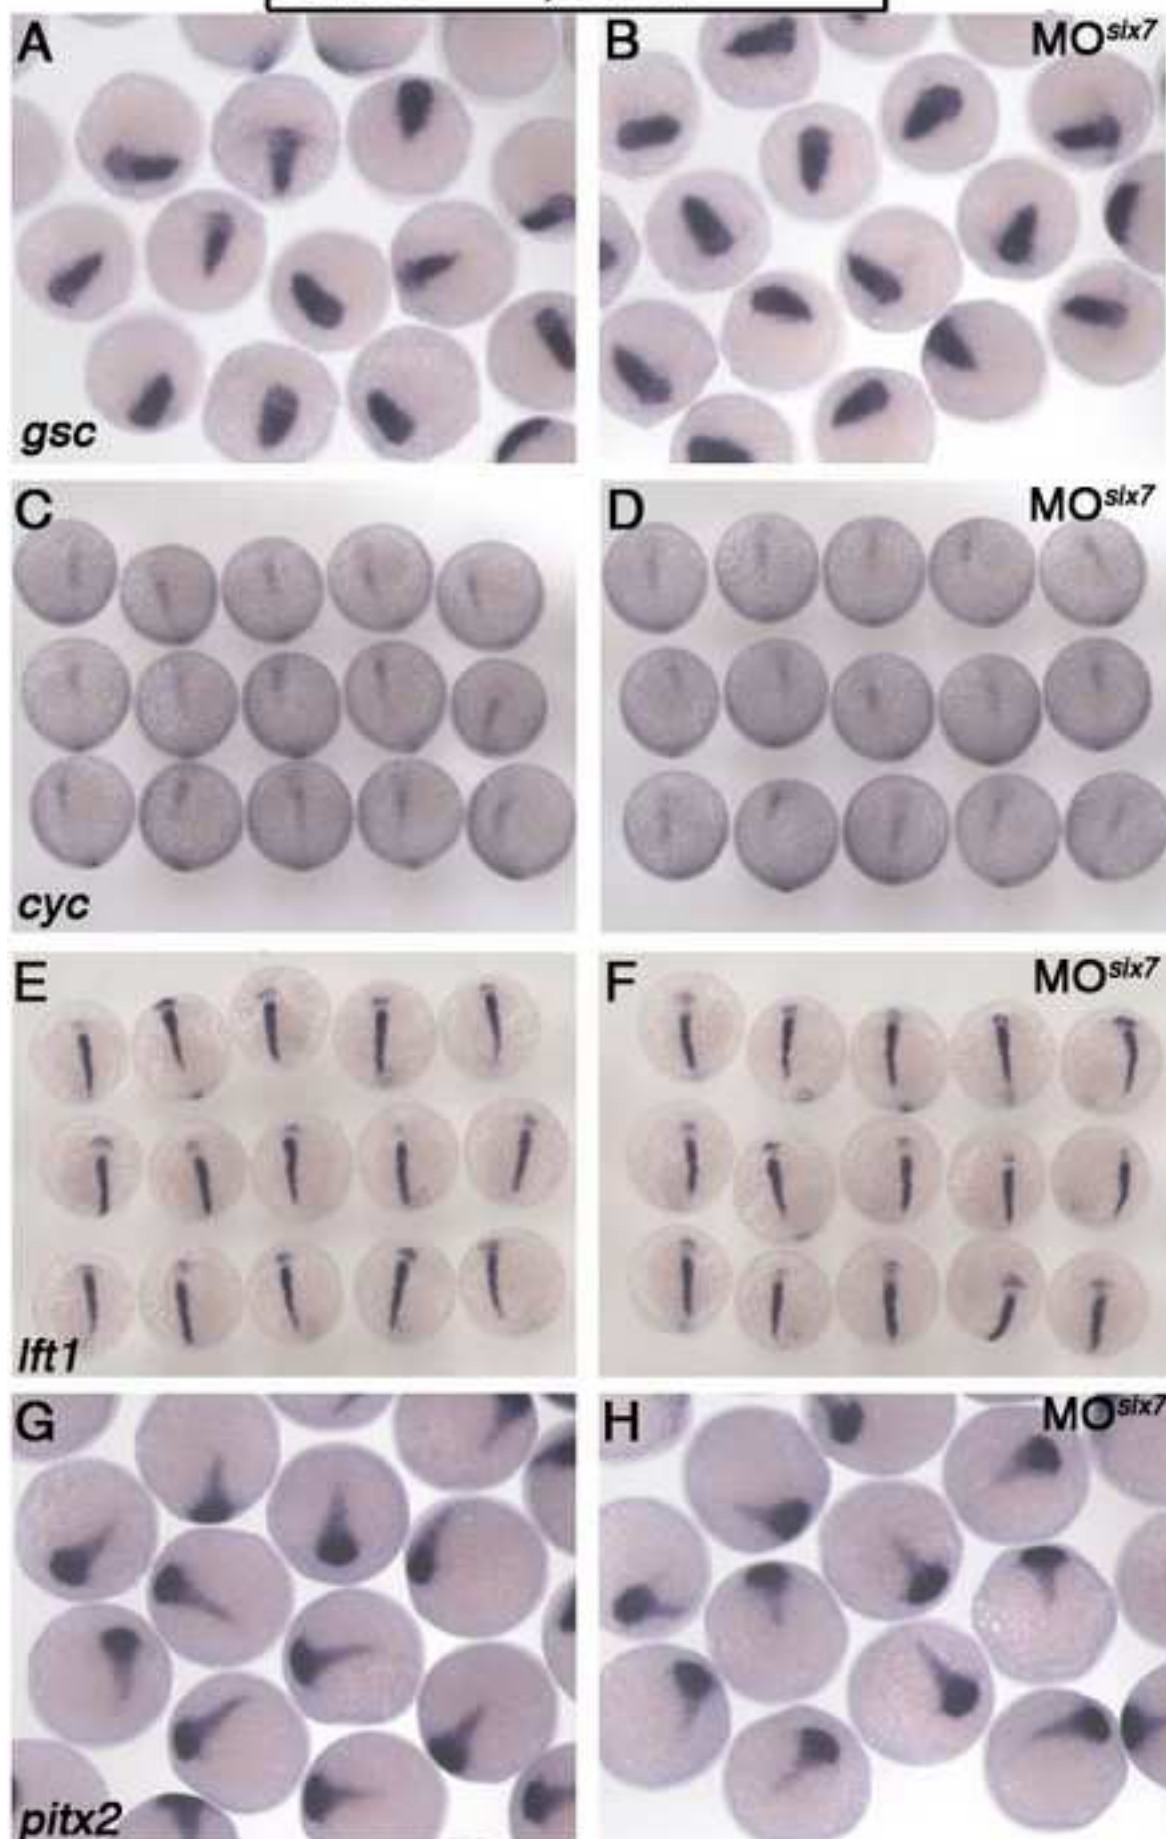

Supplement: NIHMS28217-supplement-01.pdf [file NIHMS28217-supplement-01.pdf]
